# Supplementary material for: Formation of Al-rich nanocrystalline ZSM-5 via chloride-mediated, abrupt, atypical amorphous-to-crystalline transformation
Source: Royal Society of Chemistry journal article supplement (doi:10.1039/c0jm01374a), 2010-01-01
Supplement: c0jm01374a.pdf [file c0jm01374a.pdf]

## Formation of Al-rich nanocrystalline ZSM-5 via chloride-mediated, abrupt, atypical amorphous-to- crystalline transformation

Vanessa B. Mortola<sup>1</sup>, Adriana P. Ferreira<sup>1</sup>, Joseph M. Fedeyko<sup>2</sup>, Christopher Downing<sup>4</sup>, Jose M. C. Bueno<sup>1</sup>, Mayfair C. Kung<sup>3\*</sup> and Harold H. Kung<sup>3\*</sup>

### SUPPORTING INFORMATION

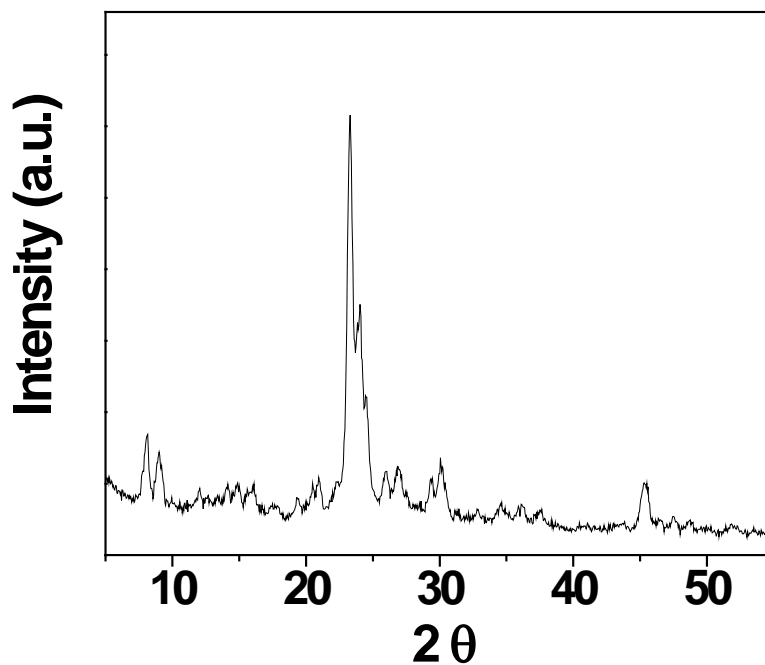

Figure S1. XRD of Z-OH-4/24

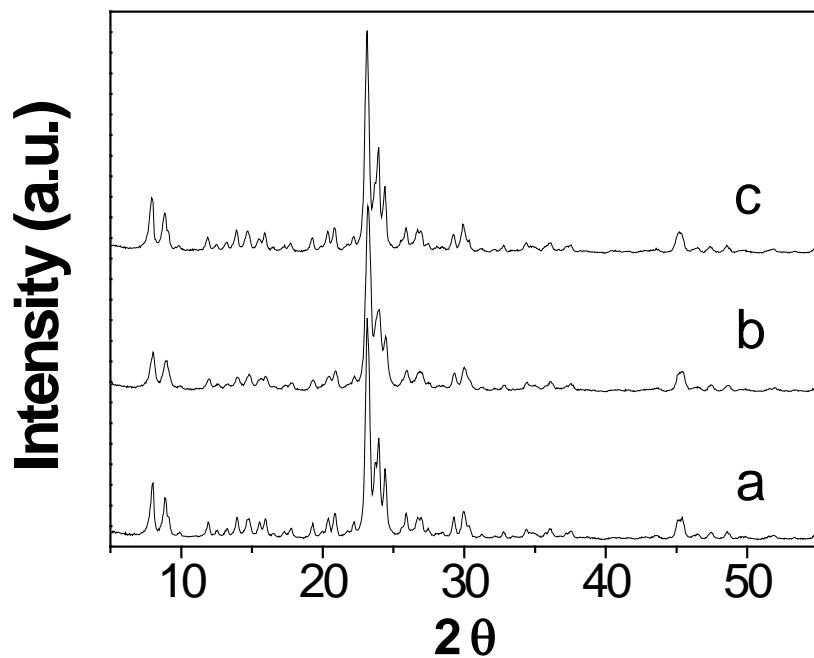

**Figure S2.** XRD of (a) Z-Cl-1/24 sedimented at 3000rpm; (b) Z-Cl-4/24 sedimented at 3000 rpm and (c) supernatant of sample (b) spun down at 10,500 rpm.

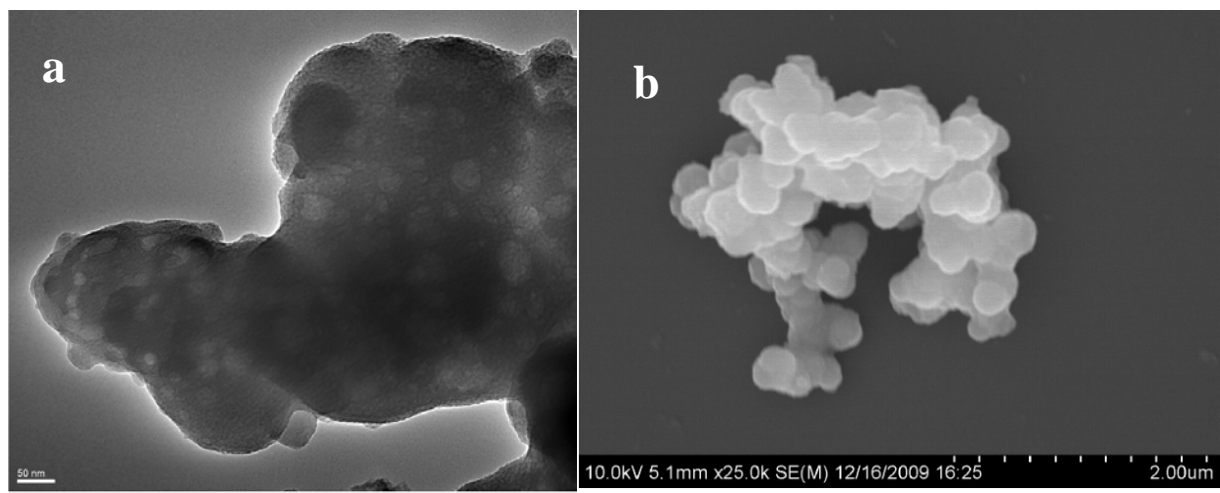

**Figure S3.** (a) TEM of Z-Cl-1.5; scale bar =50 nm and (b) SEM of Z-Cl-1.5; scale bar=2μm.

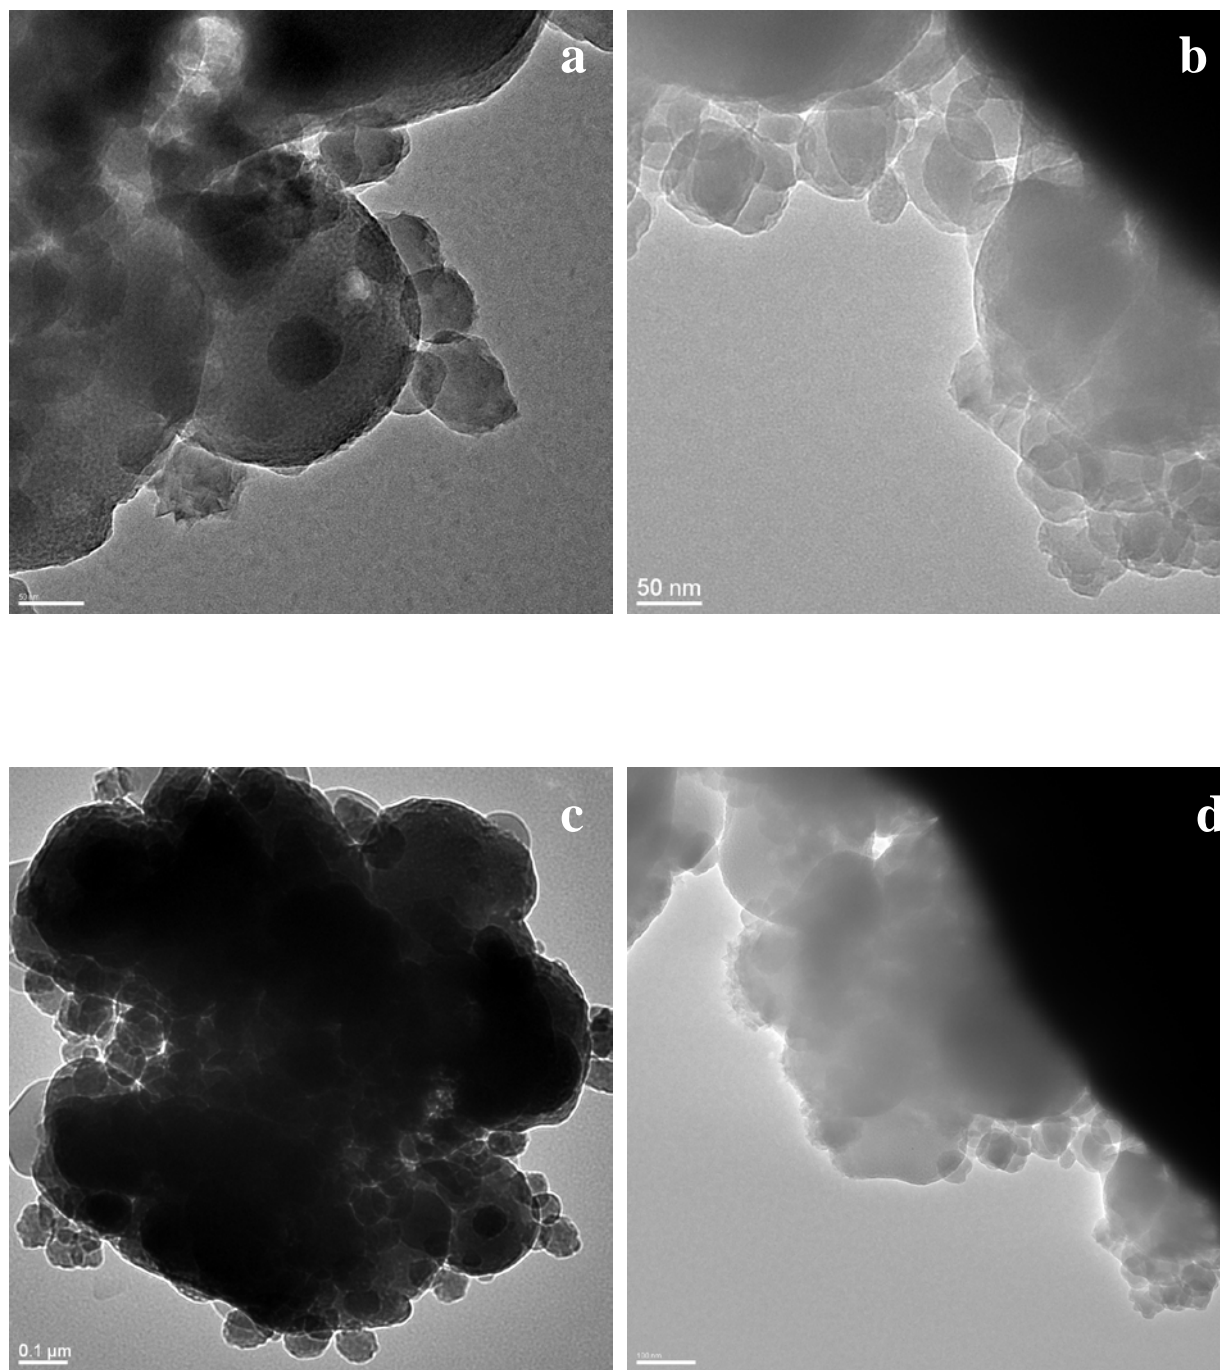

**Figure S4.** TEM images of Z-2-1.75. The scale bars of S5a and b are 50nm and that of S5c and d are 100 nm.

Table S1

| Sample                 | Surface Area (m <sup>2</sup> /g) |          |                                                                          | XRD<br>Primary<br>crystal<br>Size<br>(nm) | Calculated<br>Primary<br>crystal<br>Size <sup>a</sup><br>(nm) |
|------------------------|----------------------------------|----------|--------------------------------------------------------------------------|-------------------------------------------|---------------------------------------------------------------|
|                        | As<br>synthesized                | Calcined | External<br>Surface area<br>of calcined<br>sample from<br><i>t</i> -plot |                                           |                                                               |
| Z-OH-4/24              | 100                              | 349      | 157                                                                      | 63                                        | 32                                                            |
| Z-Cl-1/24              | 46                               | 421      | 132                                                                      | 51                                        | 70                                                            |
| Z-Cl-2/24              | 51                               | 436      | 138                                                                      | 46                                        | 63                                                            |
| Z-Cl-4/24 <sup>d</sup> | 62                               | 445      | 144                                                                      | 51                                        | 51                                                            |
| Z-Cl-2                 | 58                               | 438      | 90                                                                       | 61                                        | 55                                                            |

a: Primary crystal size, *X*, was calculated using the model of Song et. al.<sup>1</sup> that was developed assuming a cubic crystal shape.

$$\text{Crystal size } X \text{ (nm)} = 3214 / S_{\text{ext}} \text{ (m}^2\text{/g)}$$

1. Song, W.; Justice, R. E.; Jones, C. A.; Grassian, V. H.; Larsen, S. C., Size-dependent properties of nanocrystalline silicalite synthesized with systematically varied crystal sizes. *Langmuir* **2004**, *20*, (11), 4696-702.
